# Supplementary material for: Extractable impurities from fluoropolymer-based membrane filters – interference in high-throughput, untargeted analysis
Source: Royal Society of Chemistry journal article supplement (doi:10.1039/c9ra06198c), 2019-01-01
Supplement: c9ra06198c1.pdf [file c9ra06198c1.pdf]

## Electronic Supplementary Information (ESI)

### Extractable Impurities from Fluoropolymer-Based Membrane Filters – Interference in High-throughput, Untargeted Analysis

Peng Yang **Puah**<sup>\*a</sup>, Dexter Jiunn Heng **Lee**<sup>\*b</sup>, Ken Hing **Mak**<sup>c</sup>, Hui Jun **Ang**<sup>c</sup>, Hsing-Chang **Chen**<sup>d</sup>, Pak Yan **Moh**<sup>e,f</sup>, Siat Yee **Fong**<sup>\*a</sup> and Yee Soon **Ling**<sup>\*f</sup>

<sup>a</sup>Faculty of Medicine and Health Sciences, Universiti Malaysia Sabah, Jalan UMS, 88400 Kota Kinabalu, Sabah, Malaysia

<sup>b</sup>Biotechnology Research Institute, Universiti Malaysia Sabah, Jalan UMS, 88400 Kota Kinabalu, Sabah, Malaysia

<sup>c</sup>Faculty of Sustainable Agriculture, Universiti Malaysia Sabah Locked Bag No 3, 90509, Sandakan, Sabah, Malaysia

<sup>d</sup>Institute of Food Safety and Health, National Taiwan University, No. 17, Xu-Zhou Rd., Taipei, Taiwan 10055

<sup>e</sup>Faculty of Sciences and Natural Resources, Universiti Malaysia Sabah, Jalan UMS, 88400 Kota Kinabalu, Sabah, Malaysia

<sup>f</sup>Water Research Unit, Universiti Malaysia Sabah, Jalan UMS, 88400 Kota Kinabalu, Sabah, Malaysia

<sup>‡</sup>These authors contributed equally to this work.

\*Corresponding author: siatyee@ums.edu.my; ling82ys@gmail.com

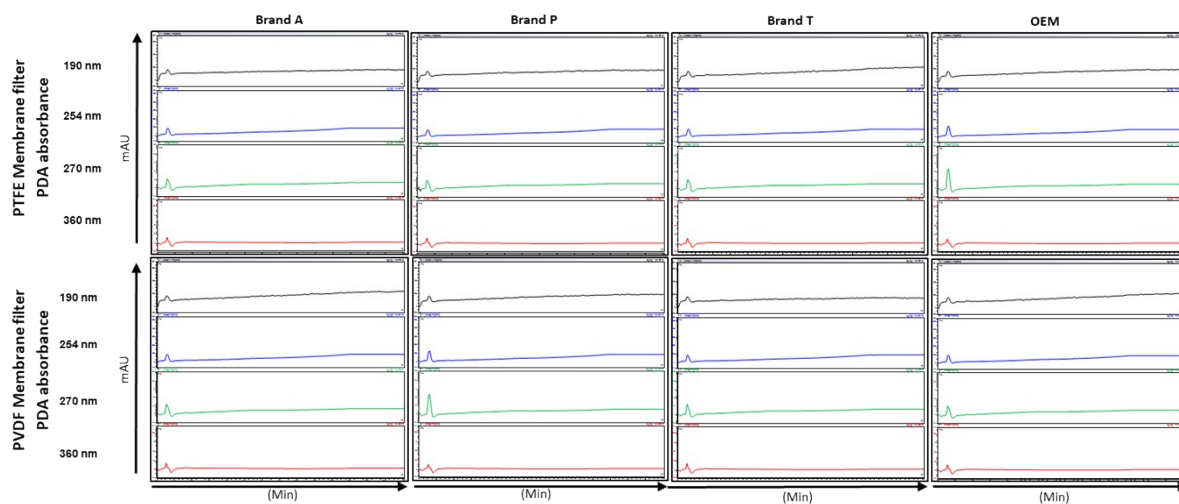

**Figure S1:** 1<sup>st</sup> purge of MeOH filtrates eluted from different brands scanned using different ultraviolet wavelengths ranging from 190-380 nm.

**Table S 1-1:** Detected extractable impurities from **Brand A, PTFE** membrane filter using Quadrupole time of flight coupled with ultra-high performance

| Detected $m/z^*$ | RT (min) | Tentative adducts                 | Molecular formulae                                             | Mass error (ppm) | Signals intensities   |                       |                            | Kruskal-Wallis ( $p$ -value) <sup>a</sup> | Fold-changes <sup>b</sup> |
|------------------|----------|-----------------------------------|----------------------------------------------------------------|------------------|-----------------------|-----------------------|----------------------------|-------------------------------------------|---------------------------|
|                  |          |                                   |                                                                |                  | 1 <sup>st</sup> purge | 3 <sup>rd</sup> purge | Reduction of impurities, % |                                           |                           |
| 387.1788         | 4.9      | [M+H] <sup>+</sup>                | C <sub>22</sub> H <sub>26</sub> O <sub>6</sub>                 | 3.56             | 24992                 | 2837                  | 88.7                       | ●                                         | -1.35                     |
| 409.1603         | 4.9      | [M+Na] <sup>+</sup>               | C <sub>22</sub> H <sub>26</sub> O <sub>6</sub>                 | 4.84             | 7704                  | 1139                  | 85.2                       | ●●●                                       | -1.28                     |
| 445.2313         | 4.9      | [M+Na] <sup>+</sup>               | C <sub>22</sub> H <sub>34</sub> N <sub>2</sub> O <sub>6</sub>  | -0.83            | 17659                 | 2590                  | 85.3                       | ●                                         | -1.14                     |
| 415.2096         | 5.3      | [M+H] <sup>+</sup>                | C <sub>17</sub> H <sub>35</sub> O <sub>9</sub> P               | -1.19            | 9760                  | 1046                  | 89.3                       | ●●●                                       | -1.55                     |
| 473.2624         | 5.3      | [M+H] <sup>+</sup>                | C <sub>26</sub> H <sub>36</sub> N <sub>2</sub> O <sub>6</sub>  | 4.62             | 11381                 | 1602                  | 85.9                       | ●●●                                       | -1.71                     |
| 274.2738         | 5.5      | [M+H] <sup>+</sup>                | C <sub>16</sub> H <sub>35</sub> N O <sub>2</sub>               | 0.83             | 107560                | 2757                  | 97.4                       | ●●●                                       | -2.41                     |
| 338.3408         | 8.2      | [M+H] <sup>+</sup>                | C <sub>22</sub> H <sub>43</sub> N O                            | 2.73             | 18883                 | 2042                  | 89.2                       | ●                                         | -1.48                     |
| 360.3222         | 8.2      | [M+Na] <sup>+</sup>               | C <sub>22</sub> H <sub>43</sub> N O                            | 4.34             | 8993                  | 355                   | 96.1                       | ●●●                                       | -2.40                     |
| 721.5027         | 9.7      | [M+H] <sup>+</sup>                | C <sub>38</sub> H <sub>73</sub> O <sub>10</sub> P              | -1.84            | 57613                 | 7185                  | 87.5                       | ●●●                                       | -1.74                     |
| 663.4501         | 9.7      | [M+H] <sup>+</sup>                | C <sub>38</sub> H <sub>62</sub> O <sub>9</sub>                 | -5.15            | 22969                 | 2442                  | 89.4                       | ●●●                                       | -1.25                     |
| 701.4053         | 9.7      | [M+Na] <sup>+</sup>               | C <sub>34</sub> H <sub>62</sub> O <sub>13</sub>                | 4.31             | 6471                  | 1459                  | 77.5                       | ●●                                        | -0.94                     |
| 685.4315         | 9.7      | [M+Na] <sup>+</sup>               | C <sub>38</sub> H <sub>62</sub> O <sub>9</sub>                 | -4.43            | 7793                  | 1054                  | 86.5                       | ●●                                        | -1.65                     |
| 718.2898         | 10.0     | [M+NH <sub>4</sub> ] <sup>+</sup> | C <sub>32</sub> H <sub>44</sub> O <sub>17</sub>                | 2.66             | 10226                 | 1327                  | 87.0                       | ●●●                                       | -1.63                     |
| 702.3159         | 10.1     | [M+NH <sub>4</sub> ] <sup>+</sup> | C <sub>36</sub> H <sub>44</sub> O <sub>13</sub>                | -5.62            | 12213                 | 1046                  | 91.4                       | ●                                         | -2.02                     |
| 697.3613         | 10.1     | [M+H] <sup>+</sup>                | C <sub>39</sub> H <sub>52</sub> O <sub>11</sub>                | -4.44            | 14749                 | 796                   | 94.6                       | ●●                                        | -2.21                     |
| 746.3207         | 10.2     | [M+NH <sub>4</sub> ] <sup>+</sup> | C <sub>41</sub> H <sub>44</sub> O <sub>12</sub>                | -4.88            | 10017                 | 2380                  | 76.2                       | ●●                                        | -0.83                     |
| 725.3921         | 10.3     | [M+Na] <sup>+</sup>               | C <sub>39</sub> H <sub>58</sub> O <sub>11</sub>                | -7.03            | 13775                 | 1148                  | 91.7                       | ●                                         | -2.01                     |
| 730.3476         | 10.3     | [M+Na] <sup>+</sup>               | C <sub>36</sub> H <sub>53</sub> N O <sub>13</sub>              | -9.50            | 11600                 | 1765                  | 84.8                       | ●●●                                       | -1.61                     |
| 753.4235         | 10.4     | [M+H] <sup>+</sup>                | C <sub>36</sub> H <sub>64</sub> O <sub>16</sub>                | 4.33             | 7846                  | 926                   | 88.2                       | ●●                                        | -1.69                     |
| 774.3522         | 10.4     | [M+H] <sup>+</sup>                | C <sub>31</sub> H <sub>55</sub> N <sub>3</sub> O <sub>19</sub> | -2.48            | 8024                  | 1997                  | 75.1                       | ●●                                        | -0.81                     |

liquid chromatography.

\* Listed molecules are single-charged

<sup>a</sup>●,  $p$ -value < 0.05; ●●,  $p$ -value < 0.01; ●●●,  $p$ -value < 0.001 determined by parametric Kruskal-Wallis test

<sup>b</sup>Fold changes of peak area relative to mean control. Log<sub>2</sub> transformed. Values > 0 represent increase relative to 1<sup>st</sup> purge and values < 0 represent decrease relative to 1<sup>st</sup> purge



**Table S 1-2:** Detected extractable impurities from **Brand P, PTFE** membrane filter using Quadrupole-time-of flight coupled with ultra-high performance

| Detected $m/z^*$ | RT (min) | Tentative adducts                 | Molecular formulae                                            | Mass error (ppm) | Signals intensities   |                       |                            | Kruskal-Wallis ( $p$ -value) <sup>a</sup> | Fold-changes <sup>b</sup> |
|------------------|----------|-----------------------------------|---------------------------------------------------------------|------------------|-----------------------|-----------------------|----------------------------|-------------------------------------------|---------------------------|
|                  |          |                                   |                                                               |                  | 1 <sup>st</sup> purge | 3 <sup>rd</sup> purge | Reduction of impurities, % |                                           |                           |
| 172.09465        | 0.5      | [M+Na] <sup>+</sup>               | C <sub>6</sub> H <sub>15</sub> N O <sub>3</sub>               | -1.58            | 6244                  | 267                   | 95.7                       | ●●●                                       | -4.99                     |
| 150.11279        | 0.5      | [M+H] <sup>+</sup>                | C <sub>6</sub> H <sub>15</sub> N O <sub>3</sub>               | -2.15            | 33442                 | 1086                  | 96.8                       | ●●●                                       | -4.95                     |
| 132.10245        | 0.6      | [M+H] <sup>+</sup>                | C <sub>6</sub> H <sub>13</sub> N O <sub>2</sub>               | -4.16            | 7018                  | 204                   | 97.1                       | ●●●                                       | -3.21                     |
| 166.10751        | 0.6      | [M+NH <sub>4</sub> ] <sup>+</sup> | C <sub>6</sub> H <sub>12</sub> O <sub>4</sub>                 | -0.85            | 5501                  | 131                   | 97.6                       | ●●●                                       | -6.20                     |
| 387.17871        | 4.9      | [M+H] <sup>+</sup>                | C <sub>22</sub> H <sub>26</sub> O <sub>6</sub>                | 3.90             | 5836                  | 2193                  | 62.4                       | ●                                         | -1.21                     |
| 445.23150        | 4.9      | [M+Na] <sup>+</sup>               | C <sub>22</sub> H <sub>34</sub> N <sub>2</sub> O <sub>6</sub> | -1.40            | 5697                  | 2044                  | 64.1                       | ●●                                        | -1.39                     |
| 547.32206        | 5.3      | [M+NH <sub>4</sub> ] <sup>+</sup> | C <sub>27</sub> H <sub>39</sub> N <sub>5</sub> O <sub>6</sub> | 3.40             | 7913                  | 158                   | 98.0                       | ●●●                                       | -5.59                     |
| 591.34787        | 5.4      | [M+H] <sup>+</sup>                | C <sub>33</sub> H <sub>50</sub> O <sub>9</sub>                | 8.28             | 7715                  | 157                   | 98.0                       | ●●●                                       | -5.80                     |
| 635.37277        | 5.5      | [M+Na] <sup>+</sup>               | C <sub>33</sub> H <sub>56</sub> O <sub>10</sub>               | 6.20             | 5585                  | 116                   | 97.9                       | ●●●                                       | -6.88                     |
| 338.34141        | 8.2      | [M+H] <sup>+</sup>                | C <sub>22</sub> H <sub>43</sub> N O                           | 0.98             | 17356                 | 5924                  | 65.9                       | ●                                         | -1.42                     |
| 360.32276        | 8.2      | [M+Na] <sup>+</sup>               | C <sub>22</sub> H <sub>43</sub> N O                           | 2.74             | 7938                  | 2363                  | 70.2                       | ●●●                                       | -1.56                     |
| 721.50319        | 9.7      | [M+H] <sup>+</sup>                | C <sub>38</sub> H <sub>73</sub> O <sub>10</sub> P             | -2.47            | 55072                 | 34085                 | 38.1                       | ●●                                        | -1.34                     |
| 663.45047        | 9.7      | [M+H] <sup>+</sup>                | C <sub>38</sub> H <sub>62</sub> O <sub>9</sub>                | -5.75            | 22178                 | 12156                 | 45.2                       | ●                                         | -1.44                     |
| 701.40561        | 9.7      | [M+Na] <sup>+</sup>               | C <sub>34</sub> H <sub>62</sub> O <sub>13</sub>               | 3.91             | 7140                  | 4832                  | 32.3                       | ●●●                                       | -1.40                     |
| 685.43188        | 9.7      | [M+Na] <sup>+</sup>               | C <sub>38</sub> H <sub>62</sub> O <sub>9</sub>                | -4.94            | 7627                  | 4424                  | 42.0                       | ●●●                                       | -2.02                     |

liquid chromatography.

\* Listed molecules are single-charged

<sup>a</sup>●,  $p$ -value < 0.05; ●●,  $p$ -value < 0.01; ●●●,  $p$ -value < 0.001 determined by parametric Kruskal-Wallis test

<sup>b</sup>Fold changes of peak area relative to mean control. Log<sub>2</sub> transformed. Values > 0 represent increase relative to 1<sup>st</sup> purge and values < 0 represent decrease relative to 1<sup>st</sup> purge

**Table S 1-3:** Detected extractable impurities from **Brand T, PTFE** membrane filter using Quadrupole time of flight coupled with ultra-high performance

| Detected $m/z^*$ | RT (min) | Tentative adducts   | Molecular formulae                                            | Mass error (ppm) | Signals intensities   |                       |                            | Kruskal-Wallis ( $p$ -value) <sup>a</sup> | Fold-changes <sup>b</sup> |
|------------------|----------|---------------------|---------------------------------------------------------------|------------------|-----------------------|-----------------------|----------------------------|-------------------------------------------|---------------------------|
|                  |          |                     |                                                               |                  | 1 <sup>st</sup> purge | 3 <sup>rd</sup> purge | Reduction of impurities, % |                                           |                           |
| 445.2324         | 4.9      | [M+Na] <sup>+</sup> | C <sub>22</sub> H <sub>34</sub> N <sub>2</sub> O <sub>6</sub> | -3.42            | 27139                 | 16528                 | 39.1                       | ●●                                        | -1.56                     |
| 387.1803         | 4.9      | [M+H] <sup>+</sup>  | C <sub>22</sub> H <sub>26</sub> O <sub>6</sub>                | -0.19            | 42488                 | 20175                 | 52.5                       | ●●●                                       | -1.75                     |
| 409.1615         | 4.9      | [M+Na] <sup>+</sup> | C <sub>22</sub> H <sub>26</sub> O <sub>6</sub>                | 1.63             | 12694                 | 7525                  | 40.7                       | ●●●                                       | -1.82                     |
| 425.1353         | 5.0      | [M+H] <sup>+</sup>  | C <sub>22</sub> H <sub>20</sub> N <sub>2</sub> O <sub>7</sub> | -2.36            | 6729                  | 5267                  | 21.7                       | ●                                         | -0.38                     |
| 415.2113         | 5.4      | [M+H] <sup>+</sup>  | C <sub>17</sub> H <sub>35</sub> O <sub>9</sub> P              | -5.30            | 9428                  | 409                   | 95.7                       | ●●●                                       | -1.79                     |
| 473.2638         | 5.5      | [M+H] <sup>+</sup>  | C <sub>26</sub> H <sub>36</sub> N <sub>2</sub> O <sub>6</sub> | 1.70             | 11429                 | 594                   | 94.8                       | ●●●                                       | -1.69                     |
| 274.2751         | 5.5      | [M+H] <sup>+</sup>  | C <sub>16</sub> H <sub>35</sub> N O <sub>2</sub>              | -3.75            | 71064                 | 2439                  | 96.6                       | ●●●                                       | -3.19                     |
| 338.3425         | 8.2      | [M+H] <sup>+</sup>  | C <sub>22</sub> H <sub>43</sub> N O                           | -2.37            | 10116                 | 1907                  | 81.2                       | ●                                         | -1.01                     |
| 360.3243         | 8.2      | [M+Na] <sup>+</sup> | C <sub>22</sub> H <sub>43</sub> N O                           | -1.67            | 5105                  | 314                   | 93.9                       | ●●                                        | -0.64                     |
| 721.5036         | 9.7      | [M+H] <sup>+</sup>  | C <sub>38</sub> H <sub>73</sub> O <sub>10</sub> P             | -2.98            | 46259                 | 13268                 | 71.3                       | ●                                         | -1.17                     |
| 663.4506         | 9.7      | [M+H] <sup>+</sup>  | C <sub>38</sub> H <sub>62</sub> O <sub>9</sub>                | -5.95            | 18813                 | 4420                  | 76.5                       | ●●                                        | -1.25                     |
| 701.4069         | 9.7      | [M+Na] <sup>+</sup> | C <sub>34</sub> H <sub>62</sub> O <sub>13</sub>               | 2.04             | 6417                  | 2520                  | 60.7                       | ●                                         | -0.67                     |
| 685.4326         | 9.7      | [M+Na] <sup>+</sup> | C <sub>38</sub> H <sub>62</sub> O <sub>9</sub>                | -6.06            | 6515                  | 1915                  | 70.6                       | ●●                                        | -0.87                     |

liquid chromatography.

\* Listed molecules are single-charged

<sup>a</sup>●,  $p$ -value < 0.05; ●●,  $p$ -value < 0.01; ●●●,  $p$ -value < 0.001 determined by parametric Kruskal-Wallis test

<sup>b</sup>Fold changes of peak area relative to mean control. Log<sub>2</sub> transformed. Values > 0 represent increase relative to 1<sup>st</sup> purge and values < 0 represent decrease relative to 1<sup>st</sup> purge

**Table S 1-4:** Detected extractable impurities from **OEM, PTFE** membrane filter using Quadrupole time of flight coupled with ultra-high performance liquid

| Detected $m/z^*$ | RT (min) | Tentative adducts                 | Molecular formulae                                            | Mass error (ppm) | Signals intensities   |                       |                            | Kruskal-Wallis ( $p$ -value) <sup>a</sup> | Fold-changes <sup>b</sup> |
|------------------|----------|-----------------------------------|---------------------------------------------------------------|------------------|-----------------------|-----------------------|----------------------------|-------------------------------------------|---------------------------|
|                  |          |                                   |                                                               |                  | 1 <sup>st</sup> purge | 3 <sup>rd</sup> purge | Reduction of impurities, % |                                           |                           |
| 387.1779         | 4.9      | [M+H] <sup>+</sup>                | C <sub>22</sub> H <sub>26</sub> O <sub>6</sub>                | 5.89             | 23384                 | 745                   | 96.8                       | ●●●                                       | -1.07                     |
| 445.2302         | 4.9      | [M+Na] <sup>+</sup>               | C <sub>22</sub> H <sub>34</sub> N <sub>2</sub> O <sub>6</sub> | 1.58             | 15939                 | 726                   | 95.5                       | ●●                                        | -0.80                     |
| 409.1597         | 4.9      | [M+Na] <sup>+</sup>               | C <sub>22</sub> H <sub>26</sub> O <sub>6</sub>                | 6.26             | 7330                  | 331                   | 95.5                       | ●●                                        | -1.45                     |
| 437.1907         | 5.4      | [M+NH <sub>4</sub> ] <sup>+</sup> | C <sub>21</sub> H <sub>25</sub> N O <sub>8</sub>              | 2.84             | 7154                  | 139                   | 98.1                       | ●●●                                       | -2.83                     |
| 415.2090         | 5.4      | [M+H] <sup>+</sup>                | C <sub>17</sub> H <sub>35</sub> O <sub>9</sub> P              | 0.30             | 10119                 | 223                   | 97.8                       | ●●●                                       | -1.56                     |
| 473.2615         | 5.5      | [M+H] <sup>+</sup>                | C <sub>26</sub> H <sub>36</sub> N <sub>2</sub> O <sub>6</sub> | 6.51             | 12350                 | 345                   | 97.2                       | ●●                                        | -1.41                     |
| 274.2731         | 5.5      | [M+H] <sup>+</sup>                | C <sub>16</sub> H <sub>35</sub> N O <sub>2</sub>              | 3.57             | 618291                | 6833                  | 98.9                       | ●●●                                       | -2.76                     |
| 296.2547         | 5.5      | [M+Na] <sup>+</sup>               | C <sub>16</sub> H <sub>35</sub> N O <sub>2</sub>              | 4.94             | 11874                 | 312                   | 97.4                       | ●                                         | -1.73                     |
| 230.2471         | 5.7      | [M+H] <sup>+</sup>                | C <sub>14</sub> H <sub>31</sub> N O                           | 3.10             | 7311                  | 153                   | 97.9                       | ●●●                                       | -2.41                     |
| 318.2988         | 5.7      | [M+H] <sup>+</sup>                | C <sub>18</sub> H <sub>39</sub> N O <sub>3</sub>              | 4.73             | 7432                  | 160                   | 97.9                       | ●●                                        | -2.01                     |
| 492.4018         | 8.2      | [M+NH <sub>4</sub> ] <sup>+</sup> | C <sub>30</sub> H <sub>50</sub> O <sub>4</sub>                | 6.21             | 7397                  | NA                    | 100.0                      | -                                         | -                         |
| 520.4332         | 8.8      | [M+NH <sub>4</sub> ] <sup>+</sup> | C <sub>32</sub> H <sub>54</sub> O <sub>4</sub>                | 5.72             | 14659                 | 179                   | 98.8                       | ●●●                                       | -1.36                     |
| 721.5020         | 9.7      | [M+H] <sup>+</sup>                | C <sub>38</sub> H <sub>73</sub> O <sub>10</sub> P             | -0.75            | 88231                 | 10157                 | 88.5                       | ●●                                        | -1.11                     |
| 663.4489         | 9.7      | [M+H] <sup>+</sup>                | C <sub>38</sub> H <sub>62</sub> O <sub>9</sub>                | -3.44            | 40390                 | 3520                  | 91.3                       | ●●●                                       | -0.98                     |
| 701.4048         | 9.7      | [M+Na] <sup>+</sup>               | C <sub>34</sub> H <sub>62</sub> O <sub>13</sub>               | 5.18             | 8915                  | 1944                  | 78.2                       | ●●                                        | -0.87                     |
| 685.4310         | 9.7      | [M+Na] <sup>+</sup>               | C <sub>38</sub> H <sub>62</sub> O <sub>9</sub>                | -3.60            | 11047                 | 1495                  | 86.5                       | ●●●                                       | -1.02                     |

chromatography.

\* Listed molecules are single-charged

<sup>a</sup>●,  $p$ -value < 0.05; ●●,  $p$ -value < 0.01; ●●●,  $p$ -value < 0.001 determined by parametric Kruskal-Wallis test

<sup>b</sup>Fold changes of peak area relative to mean control. Log<sub>2</sub> transformed. Values > 0 represent increase relative to 1<sup>st</sup> purge and values < 0 represent decrease relative to 1<sup>st</sup> purge





**Table S 2-1:** Detected extractable impurities from **Brand A, PVDF** membrane filter using Quadrupole-time-of flight coupled with ultra-high performance

| Detected $m/z^*$ | RT (min) | Tentative adducts   | Molecular formulae                                             | Mass error (ppm) | Signals intensities   |                       |                            | Kruskal-Wallis ( $p$ -value) <sup>a</sup> | Fold-changes <sup>b</sup> |
|------------------|----------|---------------------|----------------------------------------------------------------|------------------|-----------------------|-----------------------|----------------------------|-------------------------------------------|---------------------------|
|                  |          |                     |                                                                |                  | 1 <sup>st</sup> purge | 3 <sup>rd</sup> purge | Reduction of impurities, % |                                           |                           |
| 568.29327        | 4.5      | [M+H] <sup>+</sup>  | C <sub>21</sub> H <sub>41</sub> N <sub>7</sub> O <sub>11</sub> | 0.73             | 16384                 | 2957                  | 81.95                      | ●●●                                       | -1.21                     |
| 445.23136        | 4.9      | [M+Na] <sup>+</sup> | C <sub>22</sub> H <sub>34</sub> N <sub>2</sub> O <sub>6</sub>  | -1.07            | 13803                 | 1066                  | 92.28                      | ●●                                        | -1.21                     |
| 387.17866        | 4.9      | [M+H] <sup>+</sup>  | C <sub>22</sub> H <sub>26</sub> O <sub>6</sub>                 | 4.03             | 19728                 | 1131                  | 94.27                      | ●●●                                       | -1.86                     |
| 296.25550        | 5.5      | [M+Na] <sup>+</sup> | C <sub>16</sub> H <sub>35</sub> N O <sub>2</sub>               | 1.83             | 26579                 | 3221                  | 87.88                      | ●●●                                       | -1.31                     |
| 274.27417        | 5.5      | [M+H] <sup>+</sup>  | C <sub>16</sub> H <sub>35</sub> N O <sub>2</sub>               | -0.42            | 1428802               | 85918                 | 93.99                      | ●●                                        | -1.81                     |
| 230.24798        | 5.6      | [M+H] <sup>+</sup>  | C <sub>14</sub> H <sub>31</sub> N O                            | -0.61            | 99261                 | 2580                  | 97.40                      | ●●●                                       | -1.42                     |
| 318.29969        | 5.7      | [M+H] <sup>+</sup>  | C <sub>18</sub> H <sub>39</sub> N O <sub>3</sub>               | 1.83             | 22997                 | 4727                  | 79.45                      | ●●●                                       | -1.11                     |
| 338.34181        | 8.2      | [M+H] <sup>+</sup>  | C <sub>22</sub> H <sub>43</sub> N O                            | -0.20            | 19671                 | 1671                  | 91.51                      | ●●●                                       | -1.72                     |
| 360.32239        | 8.2      | [M+Na] <sup>+</sup> | C <sub>22</sub> H <sub>43</sub> N O                            | 3.84             | 9364                  | 285                   | 96.96                      | ●●●                                       | -1.74                     |
| 665.44103        | 9.5      | [M+H] <sup>+</sup>  | C <sub>34</sub> H <sub>65</sub> O <sub>10</sub> P              | -3.34            | 7563                  | 343                   | 95.46                      | ●●                                        | -1.53                     |
| 721.50284        | 9.7      | [M+H] <sup>+</sup>  | C <sub>38</sub> H <sub>73</sub> O <sub>10</sub> P              | -1.98            | 152351                | 8306                  | 94.55                      | ●●                                        | -1.44                     |
| 663.45021        | 9.7      | [M+H] <sup>+</sup>  | C <sub>38</sub> H <sub>62</sub> O <sub>9</sub>                 | -5.36            | 75075                 | 2802                  | 96.27                      | ●●                                        | -1.71                     |
| 685.43190        | 9.7      | [M+Na] <sup>+</sup> | C <sub>38</sub> H <sub>62</sub> O <sub>9</sub>                 | -4.98            | 17092                 | 1231                  | 92.80                      | ●●                                        | -1.06                     |

liquid chromatography.

\* Listed molecules are single-charged

<sup>a</sup>●,  $p$ -value < 0.05; ●●,  $p$ -value < 0.01; ●●●,  $p$ -value < 0.001 determined by parametric Kruskal-Wallis test

<sup>b</sup>Fold changes of peak area relative to mean control. Log<sub>2</sub> transformed. Values > 0 represent increase relative to 1<sup>st</sup> purge and values < 0 represent decrease relative to 1<sup>st</sup> purge

**Table S 2-2:** Detected extractable impurities from **Brand P, PVDF** membrane filter using Quadrupole-time-of flight coupled with ultra-high performance liquid chromatography.

\* Listed molecules are single-charged

<sup>a</sup>●, *p*-value < 0.05; ●●, *p*-value < 0.01; ●●●, *p*-value < 0.001 determined by parametric Kruskal-Wallis test

| Detected <i>m/z</i> * | RT (min) | Tentative adducts                 | Molecular formulae                                            | Mass error (ppm) | Signals intensities   |                       |                            | Kruskal-Wallis ( <i>p</i> -value) <sup>a</sup> | Fold-changes <sup>b</sup> |
|-----------------------|----------|-----------------------------------|---------------------------------------------------------------|------------------|-----------------------|-----------------------|----------------------------|------------------------------------------------|---------------------------|
|                       |          |                                   |                                                               |                  | 1 <sup>st</sup> purge | 3 <sup>rd</sup> purge | Reduction of impurities, % |                                                |                           |
| 164.12852             | 0.5      | [M+H] <sup>+</sup>                | C <sub>7</sub> H <sub>17</sub> N O <sub>3</sub>               | -2.45            | 8417                  | 306                   | 96.36                      | ●●●                                            | -2.21                     |
| 178.14397             | 0.5      | [M+NH <sub>4</sub> ] <sup>+</sup> | C <sub>8</sub> H <sup>16</sup> O <sub>3</sub>                 | -1.25            | 10712                 | 391                   | 96.35                      | ●●●                                            | -1.31                     |
| 162.14914             | 0.7      | [M+H] <sup>+</sup>                | C <sub>8</sub> H <sub>19</sub> N O <sub>2</sub>               | -1.77            | 5089                  | 195                   | 96.17                      | ●                                              | -2.14                     |
| 192.15975             | 0.8      | [M+H] <sup>+</sup>                | C <sub>9</sub> H <sub>21</sub> N O <sub>3</sub>               | -1.73            | 10088                 | 1298                  | 87.13                      | ●                                              | -1.63                     |
| 304.28455             | 4.9      | [M+NH <sub>4</sub> ] <sup>+</sup> | C <sub>17</sub> H <sub>34</sub> O <sub>3</sub>                | 0.25             | 183484                | 10164                 | 94.46                      | ●●●                                            | -1.26                     |
| 316.28423             | 5.0      | [M+H] <sup>+</sup>                | C <sub>18</sub> H <sub>37</sub> N O <sub>3</sub>              | 1.24             | 14408                 | 847                   | 94.12                      | ●●●                                            | -1.21                     |
| 387.17928             | 5.1      | [M+NH <sub>4</sub> ] <sup>+</sup> | C <sub>23</sub> H <sub>19</sub> N <sub>3</sub> O <sub>2</sub> | 6.16             | 6590                  | 1757                  | 73.34                      | ●                                              | -0.84                     |
| 635.59063             | 5.3      | [M+H] <sup>+</sup>                | C <sub>32</sub> H <sub>74</sub> N <sub>8</sub> O <sub>4</sub> | -0.08            | 47044                 | N/A                   | 100.00                     | -                                              | -                         |
| 362.32605             | 5.4      | [M+H] <sup>+</sup>                | C <sub>20</sub> H <sub>43</sub> N O <sub>4</sub>              | 1.20             | 87885                 | 11691                 | 86.70                      | ●●●                                            | -0.69                     |
| 288.28976             | 5.5      | [M+H] <sup>+</sup>                | C <sub>17</sub> H <sub>37</sub> N O <sub>2</sub>              | -0.19            | 11067                 | 1450                  | 86.90                      | ●                                              | -0.93                     |
| 332.31577             | 5.5      | [M+NH <sub>4</sub> ] <sup>+</sup> | C <sub>19</sub> H <sub>38</sub> O <sub>3</sub>                | 0.48             | 546457                | 35512                 | 93.50                      | ●●●                                            | -1.58                     |
| 318.30074             | 5.7      | [M+H] <sup>+</sup>                | C <sub>18</sub> H <sub>39</sub> N O <sub>3</sub>              | -1.48            | 2724822               | 434688                | 84.05                      | ●●●                                            | -1.20                     |
| 321.26317             | 5.7      | [M+Na] <sup>+</sup>               | C <sub>16</sub> H <sub>34</sub> N <sub>4</sub> O              | -2.31            | 48521                 | 1052                  | 97.83                      | ●●●                                            | -1.57                     |
| 470.36726             | 5.7      | [M+Na] <sup>+</sup>               | C <sub>22</sub> H <sub>49</sub> N <sub>5</sub> O <sub>4</sub> | 0.93             | 72748                 | 3799                  | 94.78                      | ●●                                             | -1.95                     |
| 514.39298             | 5.8      | [M+Na] <sup>+</sup>               | C <sub>24</sub> H <sub>53</sub> N <sub>5</sub> O <sub>5</sub> | 1.85             | 53396                 | 3362                  | 93.70                      | ●●●                                            | -1.62                     |
| 484.38262             | 6.0      | [M+Na] <sup>+</sup>               | C <sub>23</sub> H <sub>51</sub> N <sub>5</sub> O <sub>4</sub> | 1.53             | 157977                | 6307                  | 96.01                      | ●●●                                            | -1.79                     |
| 528.40850             | 6.0      | [M+Na] <sup>+</sup>               | C <sub>25</sub> H <sub>55</sub> N <sub>5</sub> O <sub>5</sub> | 2.06             | 131285                | 7377                  | 94.38                      | ●●                                             | -1.88                     |
| 335.27886             | 6.1      | [M+Na] <sup>+</sup>               | C <sub>17</sub> H <sub>36</sub> N <sub>4</sub> O              | -2.33            | 63868                 | 972                   | 98.48                      | ●●●                                            | -1.82                     |
| 572.43424             | 6.1      | [M+Na] <sup>+</sup>               | C <sub>27</sub> H <sub>59</sub> N <sub>5</sub> O <sub>6</sub> | 2.76             | 103108                | 7355                  | 92.87                      | ●                                              | -1.59                     |
| 616.45990             | 6.2      | [M+NH <sub>4</sub> ] <sup>+</sup> | C <sub>37</sub> H <sub>58</sub> O <sub>6</sub>                | -4.57            | 76127                 | 6710                  | 91.19                      | ●                                              | -1.48                     |
| 349.29432             | 6.4      | [M+H] <sup>+</sup>                | C <sub>19</sub> H <sub>40</sub> O <sub>5</sub>                | 1.52             | 66578                 | 1369                  | 97.94                      | ●●●                                            | -1.81                     |
| 377.32540             | 6.5      | [M+Na] <sup>+</sup>               | C <sub>20</sub> H <sub>42</sub> N <sub>4</sub> O              | -0.90            | 271253                | 6976                  | 97.43                      | ●●●                                            | -1.89                     |
| 586.44980             | 6.6      | [M+NH <sub>4</sub> ] <sup>+</sup> | C <sub>36</sub> H <sub>56</sub> O <sub>5</sub>                | -5.63            | 80630                 | 5337                  | 93.38                      | ●●                                             | -1.76                     |
| 630.47551             | 6.6      | [M+NH <sub>4</sub> ] <sup>+</sup> | C <sub>38</sub> H <sub>60</sub> O <sub>6</sub>                | -4.40            | 57057                 | 5105                  | 91.05                      | ●●                                             | -1.11                     |
| 333.29962             | 6.9      | [M+H] <sup>+</sup>                | C <sub>19</sub> H <sub>40</sub> O <sub>4</sub>                | 0.95             | 65947                 | 1539                  | 97.67                      | ●●                                             | -1.53                     |

|           |      |                                   |                                                                |       |        |       |       |     |       |
|-----------|------|-----------------------------------|----------------------------------------------------------------|-------|--------|-------|-------|-----|-------|
| 614.48077 | 6.8  | [M+NH <sub>4</sub> ] <sup>+</sup> | C <sub>38</sub> H <sub>60</sub> O <sub>5</sub>                 | -4.81 | 142766 | 12653 | 91.14 | ●●● | -1.93 |
| 658.50671 | 6.8  | [M+NH <sub>4</sub> ] <sup>+</sup> | C <sub>41</sub> H <sub>60</sub> N <sub>4</sub> O <sub>2</sub>  | -1.96 | 98583  | 10203 | 89.65 | ●●● | -0.71 |
| 702.53250 | 7.0  | [M+NH <sub>4</sub> ] <sup>+</sup> | C <sub>42</sub> H <sub>68</sub> O <sub>7</sub>                 | -3.17 | 64635  | 7678  | 88.12 | ●●● | -1.02 |
| 353.26556 | 7.1  | [M+Na] <sup>+</sup>               | C <sub>19</sub> H <sub>38</sub> O <sub>4</sub>                 | 2.03  | 34589  | 3979  | 88.50 | ●   | -0.63 |
| 359.31493 | 7.8  | [M+H] <sup>+</sup>                | C <sub>21</sub> H <sub>42</sub> O <sub>4</sub>                 | 1.83  | 11045  | 485   | 95.61 | ●●● | -2.35 |
| 341.30453 | 7.9  | [M+H] <sup>+</sup>                | C <sub>21</sub> H <sub>40</sub> O <sub>3</sub>                 | 1.44  | 17312  | 800   | 95.38 | ●●  | -2.26 |
| 381.29675 | 7.5  | [M+Na] <sup>+</sup>               | C <sub>21</sub> H <sub>42</sub> O <sub>4</sub>                 | 2.18  | 85952  | 10250 | 88.07 | ●   | -0.97 |
| 267.26817 | 7.6  | [M+H] <sup>+</sup>                | C <sub>18</sub> H <sub>34</sub> O                              | 0.27  | 8024   | 431   | 94.63 | ●●  | -1.93 |
| 695.35529 | 7.8  | [M+H] <sup>+</sup>                | C <sub>38</sub> H <sub>50</sub> N <sub>2</sub> O <sub>10</sub> | -2.11 | 10634  | 1717  | 83.85 | ●   | -2.79 |
| 338.34161 | 8.2  | [M+H] <sup>+</sup>                | C <sub>22</sub> H <sub>43</sub> NO                             | 0.39  | 6973   | 5128  | 26.46 | ●   | -0.32 |
| 738.38508 | 8.3  | [M+Na] <sup>+</sup>               | C <sub>28</sub> H <sub>57</sub> N <sub>7</sub> O <sub>14</sub> | 0.69  | 6924   | 2554  | 63.11 | ●   | -0.72 |
| 458.45521 | 8.4  | [M+NH <sub>4</sub> ] <sup>+</sup> | C <sub>28</sub> H <sub>56</sub> O <sub>3</sub>                 | 3.54  | 7113   | 368   | 94.83 | ●●  | -2.03 |
| 472.47111 | 8.6  | [M+NH <sub>4</sub> ] <sup>+</sup> | C <sub>29</sub> H <sub>58</sub> O <sub>3</sub>                 | 2.89  | 225560 | 9729  | 95.69 | ●●● | -2.68 |
| 679.36023 | 8.6  | [M+Na] <sup>+</sup>               | C <sub>37</sub> H <sub>48</sub> N <sub>6</sub> O <sub>5</sub>  | -3.64 | 5801   | 1443  | 75.12 | ●●  | -1.42 |
| 486.48655 | 8.8  | [M+NH <sub>4</sub> ] <sup>+</sup> | C <sub>30</sub> H <sub>60</sub> O <sub>3</sub>                 | 3.25  | 36366  | 427   | 98.83 | ●●● | -1.82 |
| 663.45062 | 9.7  | [M+H] <sup>+</sup>                | C <sub>38</sub> H <sub>62</sub> O <sub>9</sub>                 | -5.98 | 30511  | 4946  | 83.79 | ●●● | -1.68 |
| 721.50318 | 9.7  | [M+H] <sup>+</sup>                | C <sub>38</sub> H <sub>73</sub> O <sub>10</sub> P              | -2.45 | 68094  | 14886 | 78.14 | ●●  | -1.64 |
| 685.43224 | 9.7  | [M+Na] <sup>+</sup>               | C <sub>38</sub> H <sub>62</sub> O <sub>9</sub>                 | -5.49 | 9095   | 2113  | 76.77 | ●●  | -1.62 |
| 579.53232 | 10.1 | [M+H] <sup>+</sup>                | C <sub>37</sub> H <sub>70</sub> O <sub>4</sub>                 | 4.09  | 27367  | 3934  | 85.63 | ●●● | -1.98 |
| 619.52456 | 10.1 | [M+Na] <sup>+</sup>               | C <sub>37</sub> H <sub>72</sub> O <sub>5</sub>                 | 4.42  | 30693  | 13111 | 57.28 | ●   | -0.47 |
| 607.56350 | 10.3 | [M+H] <sup>+</sup>                | C <sub>39</sub> H <sub>74</sub> O <sub>4</sub>                 | 4.10  | 219735 | 24254 | 88.96 | ●●  | -0.85 |
| 647.55565 | 10.3 | [M+Na] <sup>+</sup>               | C <sub>39</sub> H <sub>76</sub> O <sub>5</sub>                 | 4.56  | 54029  | 25821 | 52.21 | ●   | -1.13 |
| 642.60004 | 10.4 | [M+NH <sub>4</sub> ] <sup>+</sup> | C <sub>39</sub> H <sub>76</sub> O <sub>5</sub>                 | 4.90  | 16579  | 547   | 96.70 | ●●● | -1.84 |

<sup>b</sup>Fold changes of peak area relative to mean control. Log<sub>2</sub> transformed. Values > 0 represent increase relative to 1<sup>st</sup> purge and values < 0 represent decrease relative to 1<sup>st</sup> purge

**Table S2-3:** Detected extractable impurities from **Brand T, PVDF** membrane filter using Quadrupole-time-of flight coupled with ultra-high performance

| Detected $m/z^*$ | RT (min) | Tentative adducts                 | Molecular formulae                                            | Mass error (ppm) | Signals intensities   |                       |                            | Kruskal-Wallis ( $p$ -value) <sup>a</sup> | Fold-changes <sup>b</sup> |
|------------------|----------|-----------------------------------|---------------------------------------------------------------|------------------|-----------------------|-----------------------|----------------------------|-------------------------------------------|---------------------------|
|                  |          |                                   |                                                               |                  | 1 <sup>st</sup> purge | 3 <sup>rd</sup> purge | Reduction of impurities, % |                                           |                           |
| 409.16034        | 4.9      | [M+Na] <sup>+</sup>               | C <sub>22</sub> H <sub>26</sub> O <sub>6</sub>                | 4.71             | 7487                  | 380                   | 94.92                      | ●●                                        | -1.69                     |
| 445.23093        | 4.9      | [M+Na] <sup>+</sup>               | C <sub>22</sub> H <sub>34</sub> N <sub>2</sub> O <sub>6</sub> | -0.05            | 15085                 | 854                   | 94.34                      | ●●                                        | -1.72                     |
| 387.17860        | 4.9      | [M+H] <sup>+</sup>                | C <sub>22</sub> H <sub>26</sub> O <sub>6</sub>                | 4.18             | 22440                 | 939                   | 95.82                      | ●●●                                       | -1.80                     |
| 415.20965        | 5.4      | [M+H] <sup>+</sup>                | C <sub>17</sub> H <sub>35</sub> O <sub>9</sub> P              | -1.22            | 7862                  | 198                   | 97.48                      | ●●●                                       | -1.81                     |
| 473.26251        | 5.3      | [M+Na] <sup>+</sup>               | C <sub>22</sub> H <sub>43</sub> O <sub>7</sub> P              | 3.00             | 9429                  | 257                   | 97.27                      | ●                                         | -1.87                     |
| 296.25495        | 5.5      | [M+Na] <sup>+</sup>               | C <sub>16</sub> H <sub>35</sub> N O <sub>2</sub>              | 3.84             | 14430                 | 2187                  | 84.84                      | ●●●                                       | -1.52                     |
| 437.19151        | 5.5      | [M+NH <sub>4</sub> ] <sup>+</sup> | C <sub>21</sub> H <sub>25</sub> N O <sub>8</sub>              | 0.79             | 6263                  | 147                   | 97.65                      | ●●●                                       | -1.78                     |
| 274.27362        | 5.5      | [M+H] <sup>+</sup>                | C <sub>16</sub> H <sub>35</sub> N O <sub>2</sub>              | 1.59             | 806372                | 53297                 | 93.39                      | ●●                                        | -1.55                     |
| 230.24763        | 5.6      | [M+H] <sup>+</sup>                | C <sub>14</sub> H <sub>31</sub> N O                           | 0.92             | 17558                 | 763                   | 95.65                      | ●●●                                       | -1.64                     |
| 318.29949        | 5.7      | [M+H] <sup>+</sup>                | C <sub>18</sub> H <sub>39</sub> N O <sub>3</sub>              | 2.46             | 16126                 | 1721                  | 89.33                      | ●●●                                       | -0.89                     |
| 338.34016        | 8.2      | [M+H] <sup>+</sup>                | C <sub>22</sub> H <sub>43</sub> N O                           | 4.69             | 13743                 | 2284                  | 83.38                      | ●●●                                       | -1.66                     |
| 360.32230        | 8.2      | [M+Na] <sup>+</sup>               | C <sub>22</sub> H <sub>43</sub> N O                           | 4.11             | 6262                  | 651                   | 89.60                      | ●                                         | -0.92                     |
| 663.44944        | 9.7      | [M+H] <sup>+</sup>                | C <sub>38</sub> H <sub>62</sub> O <sub>9</sub>                | -4.20            | 51440                 | 3240                  | 93.70                      | ●●●                                       | -1.14                     |
| 701.40482        | 9.7      | [M+Na] <sup>+</sup>               | C <sub>34</sub> H <sub>62</sub> O <sub>13</sub>               | 5.07             | 9317                  | 1923                  | 79.36                      | ●●                                        | -0.69                     |
| 685.43089        | 9.7      | [M+Na] <sup>+</sup>               | C <sub>38</sub> H <sub>62</sub> O <sub>9</sub>                | -3.45            | 12762                 | 1351                  | 89.41                      | ●                                         | -1.61                     |
| 721.50202        | 9.7      | [M+H] <sup>+</sup>                | C <sub>38</sub> H <sub>73</sub> O <sub>10</sub> P             | -0.84            | 106323                | 9649                  | 90.92                      | ●●●                                       | -0.99                     |

liquid chromatography.

\* Listed molecules are single-charged

<sup>a</sup>●,  $p$ -value < 0.05; ●●,  $p$ -value < 0.01; ●●●,  $p$ -value < 0.001 determined by parametric Kruskal-Wallis test

<sup>b</sup>Fold changes of peak area relative to mean control. Log<sub>2</sub> transformed. Values > 0 represent increase relative to 1<sup>st</sup> purge and values < 0 represent decrease relative to 1<sup>st</sup> purge

**Table S 2-4:** Detected extractable impurities from **OEM, PVDF** membrane filter using Quadrupole-time-of flight coupled with ultra-high performance liquid

| Detected <i>m/z</i> * | RT (min) | Tentative adducts                 | Molecular formulae                                | Mass error (ppm) | Signals intensities   |                       |                            | Kruskal-Wallis ( <i>p</i> -value) <sup>a</sup> | Fold-changes <sup>b</sup> |
|-----------------------|----------|-----------------------------------|---------------------------------------------------|------------------|-----------------------|-----------------------|----------------------------|------------------------------------------------|---------------------------|
|                       |          |                                   |                                                   |                  | 1 <sup>st</sup> purge | 3 <sup>rd</sup> purge | Reduction of impurities, % |                                                |                           |
| 274.27292             | 5.5      | [M+H] <sup>+</sup>                | C <sub>16</sub> H <sub>35</sub> N O <sub>2</sub>  | 4.16             | 7726                  | 998                   | 87.08                      | ●●●                                            | -1.46                     |
| 288.28856             | 5.7      | [M+NH <sub>4</sub> ] <sup>+</sup> | C <sub>17</sub> H <sub>34</sub> O <sub>2</sub>    | 4.24             | 45422                 | 4070                  | 91.04                      | ●●●                                            | -1.94                     |
| 301.13964             | 6.0      | [M+Na] <sup>+</sup>               | C <sub>16</sub> H <sub>22</sub> O <sub>4</sub>    | 4.99             | 11150                 | 381                   | 96.58                      | ●                                              | -0.79                     |
| 205.08491             | 6.1      | [M+H] <sup>+</sup>                | C <sub>12</sub> H <sub>12</sub> O <sub>3</sub>    | 4.95             | 5050                  | 158                   | 96.87                      | ●                                              | -0.85                     |
| 316.31927             | 6.3      | [M+NH <sub>4</sub> ] <sup>+</sup> | C <sub>19</sub> H <sub>38</sub> O <sub>2</sub>    | 5.82             | 7525                  | 997                   | 86.75                      | ●●●                                            | -1.97                     |
| 353.26433             | 6.9      | [M+Na] <sup>+</sup>               | C <sub>19</sub> H <sub>38</sub> O <sub>4</sub>    | 5.75             | 75362                 | 1289                  | 98.29                      | ●●●                                            | -1.64                     |
| 313.27203             | 6.9      | [M+H] <sup>+</sup>                | C <sub>19</sub> H <sub>36</sub> O <sub>3</sub>    | 5.42             | 16267                 | 100                   | 99.39                      | ●●●                                            | -1.85                     |
| 331.28313             | 7.1      | [M+H] <sup>+</sup>                | C <sub>19</sub> H <sub>38</sub> O <sub>4</sub>    | 3.50             | 7477                  | N/A                   | 100.00                     | -                                              | -                         |
| 381.29515             | 7.5      | [M+Na] <sup>+</sup>               | C <sub>21</sub> H <sub>42</sub> O <sub>4</sub>    | 6.64             | 58864                 | 716                   | 98.78                      | ●●                                             | -1.61                     |
| 341.30298             | 7.5      | [M+H] <sup>+</sup>                | C <sub>21</sub> H <sub>40</sub> O <sub>3</sub>    | 6.00             | 9670                  | N/A                   | 100.00                     | -                                              | -                         |
| 359.31373             | 7.5      | [M+H] <sup>+</sup>                | C <sub>21</sub> H <sub>42</sub> O <sub>4</sub>    | 5.18             | 6045                  | N/A                   | 100.00                     | -                                              | -                         |
| 492.40173             | 8.1      | [M+NH <sub>4</sub> ] <sup>+</sup> | C <sub>30</sub> H <sub>50</sub> O <sub>4</sub>    | 6.34             | 79756                 | 432                   | 99.46                      | ●●●                                            | -6.47                     |
| 520.43296             | 8.7      | [M+NH <sub>4</sub> ] <sup>+</sup> | C <sub>32</sub> H <sub>54</sub> O <sub>4</sub>    | 6.12             | 169811                | 632                   | 99.63                      | ●●●                                            | -6.91                     |
| 534.44833             | 8.9      | [M+NH <sub>4</sub> ] <sup>+</sup> | C <sub>33</sub> H <sub>56</sub> O <sub>4</sub>    | 6.50             | 5171                  | 143                   | 97.23                      | ●●●                                            | -5.43                     |
| 663.44876             | 9.7      | [M+H] <sup>+</sup>                | C <sub>38</sub> H <sub>62</sub> O <sub>9</sub>    | -3.17            | 32161                 | 1446                  | 95.50                      | ●●                                             | -1.87                     |
| 721.50163             | 9.7      | [M+H] <sup>+</sup>                | C <sub>38</sub> H <sub>73</sub> O <sub>10</sub> P | -0.30            | 74355                 | 5246                  | 92.94                      | ●●●                                            | -1.92                     |
| 701.40461             | 9.7      | [M+Na] <sup>+</sup>               | C <sub>34</sub> H <sub>62</sub> O <sub>13</sub>   | 5.38             | 6687                  | 852                   | 87.26                      | ●●●                                            | -1.39                     |
| 685.43059             | 9.7      | [M+Na] <sup>+</sup>               | C <sub>38</sub> H <sub>62</sub> O <sub>9</sub>    | -2.99            | 8480                  | 622                   | 92.67                      | ●●●                                            | -2.71                     |
| 526.51643             | 9.8      | [M+H] <sup>+</sup>                | C <sub>33</sub> H <sub>67</sub> N O <sub>3</sub>  | 5.60             | 5306                  | 252                   | 95.25                      | ●●●                                            | -3.62                     |

chromatography.

\* Listed molecules are single-charged

<sup>a</sup>●, *p*-value < 0.05; ●●, *p*-value < 0.01; ●●●, *p*-value < 0.001 determined by parametric Kruskal-Wallis test

<sup>b</sup>Fold changes of peak area relative to mean control. Log<sub>2</sub> transformed. Values > 0 represent increase relative to 1<sup>st</sup> purge and values < 0 represent decrease relative to 1<sup>st</sup> purge
